# Supplementary material for: Effects of sevoflurane anaesthesia on radioligand binding to monoamine oxidase-B in vivo
Source: PubMed Central journal article supplement (PMC8258980; doi:10.1016/j.bja.2020.08.052), 2020-10-06
Supplement: mmc1.pdf [file mmc1.pdf]

## Supplementary Material

### Effects of sevoflurane anaesthesia on radioligand binding to monoamine oxidase-B *in vivo*

K. Varnäs, S.J. Finnema, P. Johnström, R. Arakawa, C. Halldin, L.I. Eriksson, L. Farde

Table S1. Regional estimates of the influx rate constant  $K_1$  for [ $^{11}\text{C}$ ]AZD9272 in non-human primates anaesthetised with ketamine/xylazine or sevoflurane. Values are presented as mean (range;  $n=3$ ).

| Brain region | $K_1$ (mL*cm <sup>-3</sup> *min <sup>-1</sup> ) |                  |
|--------------|-------------------------------------------------|------------------|
|              | Ketamine/xylazine                               | Sevoflurane      |
| CAU          | 0.33 (0.28-0.41)                                | 0.33 (0.19-0.46) |
| CER          | 0.19 (0.17-0.20)                                | 0.38 (0.35-0.43) |
| PFC          | 0.28 (0.25-0.32)                                | 0.33 (0.15-0.48) |
| PUT          | 0.30 (0.30-0.31)                                | 0.33 (0.19-0.46) |
| THA          | 0.27 (0.25-0.28)                                | 0.28 (0.21-0.32) |
| VMB          | 0.20 (0.19-0.21)                                | 0.22 (0.16-0.25) |

CAU, caudate nucleus; CER, cerebellum; PFC, prefrontal cortex;

PUT, putamen; THA, thalamus; VMB, ventral midbrain.

Table S2. Regional estimates of the influx rate constant  $K_1$  for [ $^{11}\text{C}$ ]L-deprenyl-D2 in non-human primates anaesthetised with ketamine/xylazine or sevoflurane. Values are presented as mean (range;  $n=3$ ).

| Brain region | $K_1$ (mL*cm <sup>-3</sup> *min <sup>-1</sup> ) |                  |
|--------------|-------------------------------------------------|------------------|
|              | Ketamine/xylazine                               | Sevoflurane      |
| CAU          | 0.38 (0.29-0.46)                                | 0.26 (0.23-0.33) |
| CER          | 0.19 (0.13-0.24)                                | 0.25 (0.19-0.28) |
| PFC          | 0.28 (0.23-0.34)                                | 0.20 (0.18-0.22) |
| PUT          | 0.37 (0.28-0.44)                                | 0.29 (0.24-0.35) |
| THA          | 0.28 (0.18-0.37)                                | 0.21 (0.18-0.24) |
| VMB          | 0.19 (0.13-0.25)                                | 0.15 (0.14-0.18) |

CAU, caudate nucleus; CER, cerebellum; PFC, prefrontal cortex;  
 PUT, putamen; THA, thalamus; VMB, ventral midbrain.

Table S3. Total volume of distribution ( $V_T$ ) for [ $^{11}\text{C}$ ]AZD9272 in non-human primates anaesthetised with propofol (10-20 mg kg $^{-1}$  h $^{-1}$  iv). Values are presented as mean (range;  $n=3$ ).

| Brain region | $V_T$ [ $^{11}\text{C}$ ]AZD9272 (mL*cm $^{-3}$ ) |
|--------------|---------------------------------------------------|
| CAU          | 17 (11-20)                                        |
| CER          | 7.9 (5.8-9.4)                                     |
| PFC          | 11 (7.6-13)                                       |
| PUT          | 11 (7.1-14)                                       |
| THA          | 15 (10-17)                                        |
| VMB          | 12 (7.9-16)                                       |

CAU, caudate nucleus; CER, cerebellum;  
PFC, prefrontal cortex; PUT, putamen;  
THA, thalamus VMB, ventral midbrain.

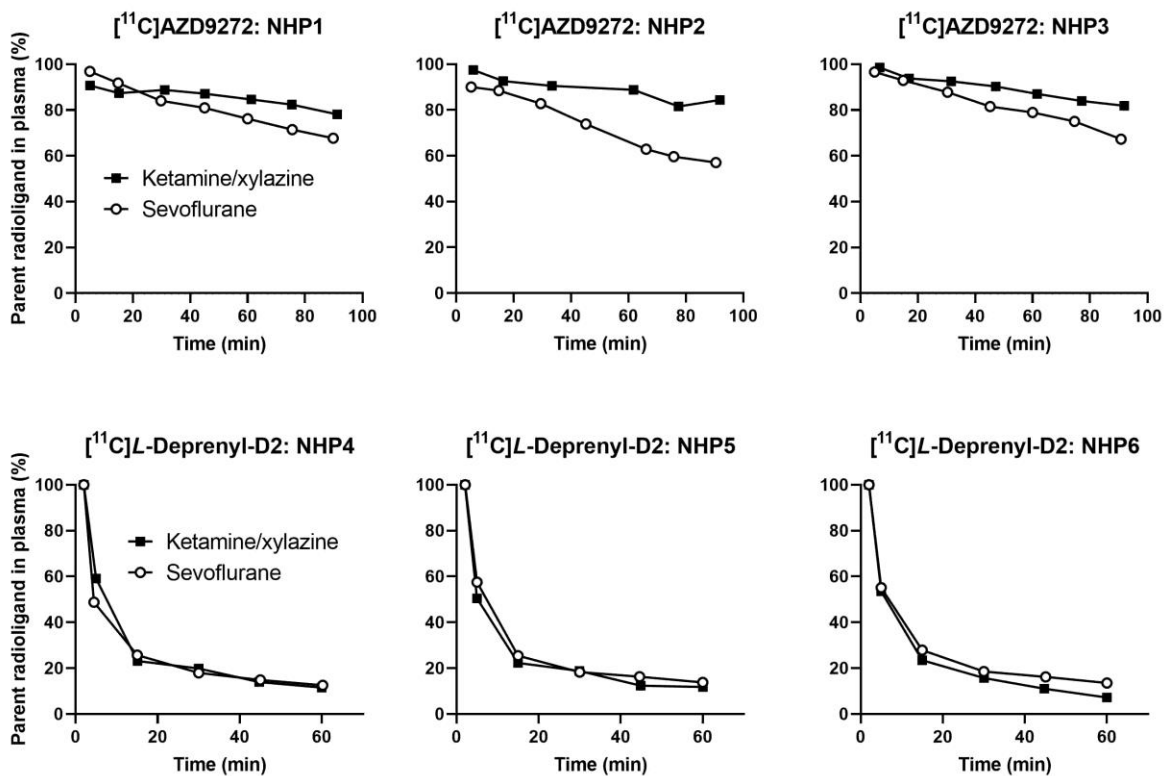

Figure S1. Percentage of unchanged (parent) radioligand in plasma determined in PET studies using  $[^{11}\text{C}]\text{AZD9272}$  (upper panel) or  $[^{11}\text{C}]\text{L-deprenyl-D2}$  (lower panel) as radioligands in non-human primates anaesthetised with ketamine/xylazine or sevoflurane.

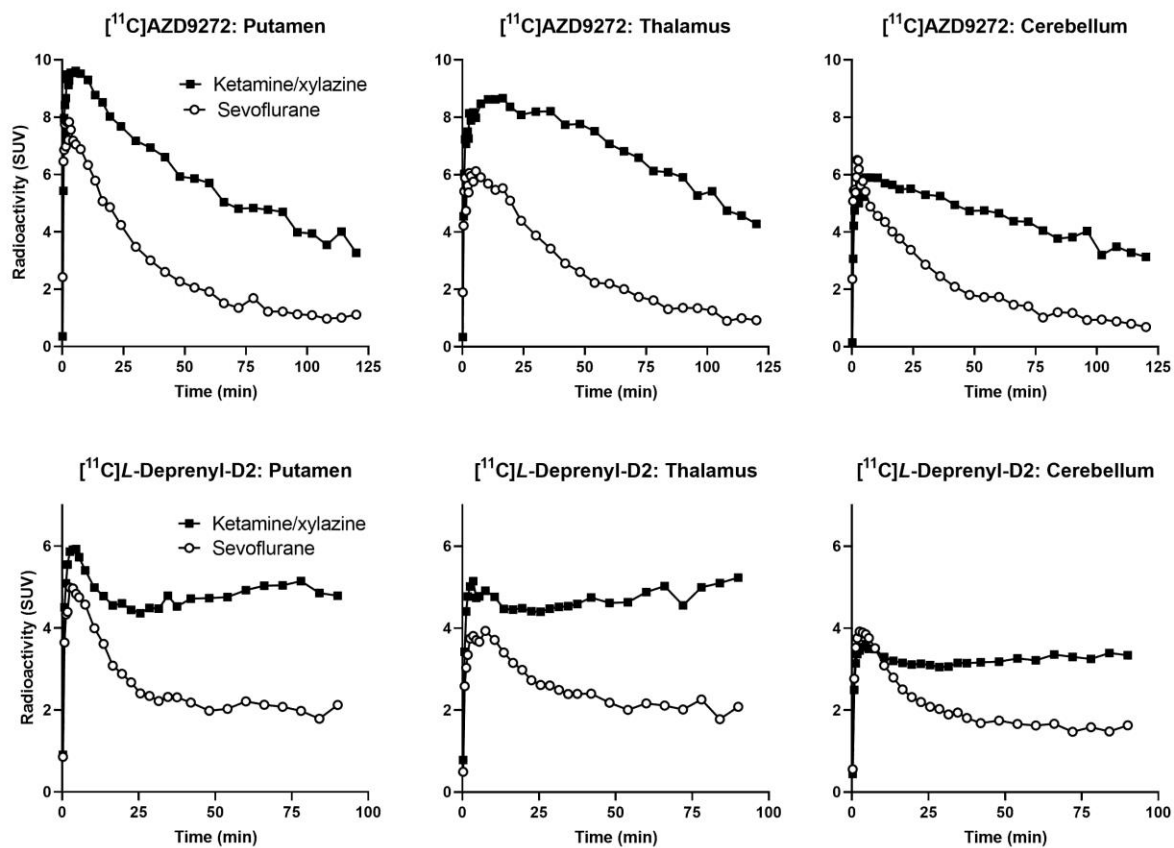

Figure S2. Time curves for regional radioactivity in PET studies using  $[^{11}\text{C}]\text{AZD9272}$  (upper panel) or  $[^{11}\text{C}]\text{L-deprenyl-D2}$  (lower panel) as radioligands in non-human primates (NHP #3 and #4, respectively) anaesthetised with ketamine/xylazine or sevoflurane.

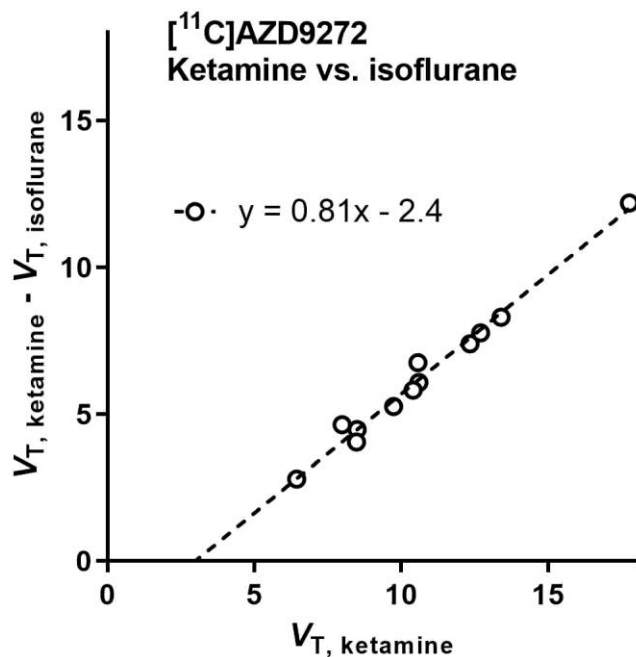

Figure S3. Graphical analysis of the difference in regional specific binding for the radioligand [<sup>11</sup>C]AZD9272 in a non-human primate anaesthetised with ketamine/xylazine or isoflurane. The relative difference in specific binding was calculated as previously described (Cunningham et al., 2010) from the slope of the line.  $V_{T, \text{ketamine}}$  and  $V_{T, \text{isoflurane}}$  represent the total distribution volume for ketamine/xylazine or isoflurane anaesthesia conditions, respectively.

## References

- Cunningham VJ, Rabiner EA, Slifstein M, Laruelle M, Gunn RN. Measuring drug occupancy in the absence of a reference region: The Lassen plot re-visited. *J Cereb Blood Flow Metab* 2010; **30**: 46–50
